1 **Simple, sensitive, and cost-effective detection of wAlbB *Wolbachia***  
2 **in *Aedes* mosquitoes, using loop mediated isothermal amplification**  
3 **combined with the electrochemical biosensing method**

4

5

6 Parinda Thayanukul<sup>1,2¶</sup>, Benchaporn Lertanantawong<sup>3¶</sup>, Worachart Sirawaraporn<sup>1</sup>,  
7 Surat Charasmongkolcharoen<sup>2</sup>, Thanyarat Chaibun<sup>3</sup>, Rattanalak Jittungdee<sup>2</sup>,  
8 Pattamaporn Kittayapong<sup>1,2\*</sup>

9

10

11

12 <sup>1</sup> Center of Excellence for Vectors and Vector-Borne Diseases, Faculty of Science,  
13 Mahidol University at Salaya, Nakhon Pathom, Thailand

14

15 <sup>2</sup> Department of Biology, Faculty of Science, Mahidol University, Bangkok, Thailand

16

17 <sup>3</sup> Biosensors Laboratory, Department of Biomedical Engineering, Faculty of  
18 Engineering, Mahidol University, Nakhon Pathom, Thailand

19

20

21 \* Corresponding author:

22 Dr. Pattamaporn Kittayapong

23 Center of Excellence for Vectors and Vector-Borne Diseases

24 2<sup>nd</sup> Floor, Science Building 2, Faculty of Science

25 Mahidol University at Salaya

26 999 Phutthamonthon 4 Road

27 Nakhon Pathom 73170, Thailand

28 Tel./Fax: +66 2 441 0227

29 Email: [pkittayapong@gmail.com](mailto:pkittayapong@gmail.com)

30

31

32 ¶ These authors contributed equally to this work. (Co-first author)

33

## 34 **Abstract**

### 35 **Background**

36 *Wolbachia* is an endosymbiont bacterium generally found in about 40% of insects,  
37 including mosquitoes, but it is absent in *Aedes aegypti* which is an important vector  
38 of several arboviral diseases. The evidence that *Wolbachia* trans-infected *Ae.*  
39 *aegypti* mosquitoes lost their vectorial competence and became less capable of  
40 transmitting arboviruses to human hosts highlights the potential of using *Wolbachia*-  
41 based approaches for prevention and control of arboviral diseases. Recently, release  
42 of *Wolbachia* trans-infected *Ae. aegypti* has been deployed widely in many countries  
43 for the control of mosquito-borne viral diseases. Field surveillance and monitoring of  
44 *Wolbachia* presence in released mosquitoes is important for the success of these  
45 control programs. So far, a number of studies have reported the development of loop  
46 mediated isothermal amplification (LAMP) assays to detect *Wolbachia* in  
47 mosquitoes, but the methods still have some specificity issues.

48

### 49 **Methodology/Principal Findings**

50 We describe here the development of a LAMP combined with the DNA strand  
51 displacement-based electrochemical sensor (BIOSENSOR) method to detect wAlbB  
52 *Wolbachia* in trans-infected *Ae. aegypti*. Our developed LAMP primers were more  
53 specific to wAlbB detection than those of the previous published ones if the assays  
54 were conducted with low-cost and non-specific detecting dyes. The detection  
55 capacity of our LAMP technique was 3.8 nM and the detection limit reduced to 2.16  
56 fM when combined with the BIOSENSOR. Our study demonstrates that the  
57 BIOSENSOR can also be applied as a stand-alone method for detecting *Wolbachia*;  
58 and it showed high sensitivity when used with the crude DNA extracts of macerated  
59 mosquito samples without DNA purification.

60

### 61 **Conclusions/Significance**

62 Our results suggest that both LAMP and BIOSENSOR, either used in combination or  
63 stand-alone, are robust and sensitive. The methods have good potential for routine  
64 detection of *Wolbachia* in mosquitoes during field surveillance and monitoring of  
65 *Wolbachia*-based release programs, especially in countries with limited resources.

66

## 67 **Author Summary**

68 Mosquito-borne diseases such as dengue, chikungunya, Zika, and yellow fever are  
69 transmitted to humans mainly by the bites of *Aedes aegypti* mosquitoes. Controlling  
70 these diseases relies mostly on the use of insecticides, in which the efficiency has  
71 been reduced through development of insecticide resistance in mosquitoes.  
72 *Wolbachia* is the endosymbiotic bacteria that are naturally found in 40% of insects,  
73 including mosquitoes. The bacteria could protect their hosts from viral infections and  
74 could also cause sterility in host populations, therefore, providing an opportunity to  
75 use them for disease control. Application of a *Wolbachia*-based strategy needs  
76 simple, rapid and sensitive methods for detecting the bacteria in released  
77 mosquitoes. In this paper, we develop the combined methods of LAMP and  
78 BIOSENSORS for detecting *wAlbB Wolbachia* in mosquitoes. Our positive LAMP  
79 reaction can be visualized by color change from violet to blue at a sensitivity of  $\geq 60$   
80 pg of genomic DNA. When used in combination with the BIOSENSOR method, the  
81 sensitivity increased a million fold without losing specificity. Our study indicates that  
82 both developed methods, either used in combination or stand-alone, are efficient and  
83 cost-effective, hence, it could be applied for routine surveys of *Wolbachia* in  
84 mosquito control programs that use *Wolbachia*-based approaches.

85  
86

87 **Key words:** *Aedes aegypti*, endosymbiotic bacteria, electrochemical biosensor,  
88 LAMP, loop mediated isothermal amplification, mosquitoes, surveillance, *Wolbachia*

89  
90

## 91 **Introduction**

92 Dengue, chikungunya, Zika, and yellow fever diseases, transmitted by the *Aedes*  
93 *aegypti* vector, continue to be a major health problem and affect human populations  
94 worldwide. Prevention of the transmission of these diseases, when vaccines have  
95 not yet been fully effective, depends primarily on two approaches, i.e., mosquito  
96 control and interruption of human-vector contact [1]. Historically, insecticides have  
97 been the primary means of mosquito control; however, the overuse and misuse of  
98 insecticides has resulted in several negative consequences. The use of many of  
99 these insecticides are problematic today; these problems include deleterious impacts  
100 on the environment and the emergence of insecticide-resistant mosquitoes [2].  
101 Alternative vector control strategies are important and need to be considered to  
102 effectively control the spread of vector-borne diseases.

103

104 *Wolbachia* is an endosymbiont found intracellularly in about 40% of insect species  
105 [3]. The bacteria can manipulate host reproduction and inhibit virus intracellular  
106 replication; hence it is potentially an effective alternative to traditional chemical  
107 pesticides. In mosquitoes, *Wolbachia* can induce cytoplasmic incompatibility (CI), a  
108 phenotype which results in the production of unviable offspring when uninfected  
109 females mate with *Wolbachia*-infected male mosquitoes. On the other hand, if  
110 *Wolbachia*-infected females mate with either infected or uninfected male mosquitoes,  
111 viable progenies harboring maternally transmitted *Wolbachia* will be produced. The  
112 effect of CI has received much attention, as it offers the potential application of  
113 *Wolbachia* in vector control. There have been a number of reports describing the  
114 stable establishment of *Wolbachia* in mosquitoes [5-7]. The use of *Wolbachia*-based  
115 approaches to reduce transmission of dengue, Zika, and other *Aedes*-borne disease  
116 viruses is currently being deployed and implemented widely in international  
117 programs in many countries [8, 9].

118

119 Although large-scale release of *Wolbachia* trans-infected *Ae. aegypti* populations  
120 into the wild has been occurring in many countries, there remains critical issues to be  
121 addressed with respect to this strategy in order to maintain the quality of the  
122 released mosquitoes. Surveillance of mosquito infection status is critical for the  
123 planning and deployment of proper mosquito control initiatives. Thus far, PCR has  
124 been the gold standard method used for detecting *Wolbachia* in mosquitoes [10, 11].

125 However, the method is laboratory based, requires trained personnel, and uses  
126 expensive instruments. Subsequently, loop-mediated isothermal amplification  
127 (LAMP), a highly sensitive and specific amplification of target DNA, was developed  
128 and is used for detecting *Wolbachia* in *Ae. aegypti*. To detect a diverse range of  
129 *Wolbachia* strains, LAMP primer sets were developed based on the 16S rRNA gene  
130 [12, 13]. To evaluate the efficacy of the *Wolbachia* trans-infected mosquito  
131 interventions, LAMP primers specific to wAlbB and wMel strains were developed  
132 based on *Wolbachia* surface protein gene (wsp) [14, 15]. High fidelity detection using  
133 LAMP combined with oligonucleotide strand displacement (OSD) probes, and  
134 enhancement of the LAMP reaction speed using two loops, have been developed  
135 [14, 16]. Recently, in Northern Australia, trials releasing wAlbB-infected *Ae. aegypti*  
136 were implemented [17]. *Wolbachia* wAlbB infected *Ae. aegypti* is suitable to apply for  
137 mosquito control in hot climate regions, because *Wolbachia* density remains high at  
138 26–40°C, which is in contrast to wMel and wMelPop infected mosquitoes [18].  
139 Therefore, the LAMP detection for the wAlbB-infected mosquitoes should be further  
140 developed and validated, so as to establish a robust, sensitive, specific detection of  
141 *Wolbachia* in field released *Ae. aegypti* mosquitoes.

142  
143 The LAMP products can be analyzed either by agarose gel electrophoresis or visual  
144 inspection of color or turbidity changes [19]. Therefore, the disadvantage of the  
145 method is mis-diagnosis caused by a false positive or false negative. An alternative  
146 method to overcome the problem is the use of electrochemical-DNA based  
147 biosensor, which employs gold-nanoparticles (AuNPs) to electrochemically label  
148 nucleic acid [20-23]. In this paper, we describe the development of a combined  
149 LAMP and electrochemical-DNA based biosensor with the strand displacement  
150 reaction methods in order to detect wAlbB *Wolbachia* trans-infected *Ae. aegypti*  
151 mosquitoes.

152

## 153 **Methods**

### 154 **Ethical issues**

155 The use of mosquito colony materials in this study was approved by the Faculty of  
156 Science, Mahidol University Animal Care and Use Committee (SCNU-ACUC)  
157 (Protocol No. MUSC64-005-554).

158

## 159 **Mosquito materials and genomic DNA extraction**

160 Laboratory rearing and field collected mosquitoes including *Aedes aegypti* (Aae-JJ),  
161 *Aedes albopictus*(Aal-CH), wAlbB trans-infected Thai *Aedes aegypti* (wAlbB-TH),  
162 and *Culex quinquefasciatus* (Cq-BK) were used in this study. The wAlbB trans-  
163 infected Thai *Aedes aegypti* was generated using the direct microinjection technique  
164 as previously described [5, 24]. The mosquito genomic DNA was extracted using the  
165 crude boiling method [25]. Briefly, mosquito samples were ground in 100 µl of  
166 Sodium Chloride-Tris-EDTA buffer (STE; 10 mM Tris-HCl pH 8.0, 1 mM EDTA and  
167 100 mM NaCl), heated for 10 min at 95°C, and centrifuged. Supernatant was  
168 transferred to a new tube and used as a template sample in subsequent LAMP,  
169 PCR, and biosensor reactions.

170

## 171 **LAMP primers and biosensor probe design**

172 The sequence of the *wsp* gene of wAlbB trans-infected Thai *Ae. aegypti* (MZ325222)  
173 was applied for designing the LAMP primers. The sequence was identical to  
174 AF020059 wAlbB from *Aedes albopictus* (Houston strain) and MN307069 *Wolbachia*  
175 of *Aedes aegypti* isolate wAegB from NCBI GenBank. This sequence was submitted  
176 to Primer Explorer v5 software ([primerexplorer.jp/lampv5e/index.html](http://primerexplorer.jp/lampv5e/index.html), Eiken  
177 Chemical Co., Japan) to generate the potential primers used in the wAlbB LAMP  
178 detection. Several potential LAMP primer sets were generated. The highly  
179 recommended regions were compared to various *wsp* sequences in the NCBI  
180 GenBank database. The DNA alignment was performed using MEGA 7.0.26  
181 software [26]. The consensus regions among most wAlbB were used to construct  
182 LAMP primers and biosensor probes (Table 1). All primers and probes were  
183 synthesized by Bio Basic Canada, Inc. Canada and Integrated DNA Technologies,  
184 USA, respectively.

185

186 **Table 1.** Oligonucleotide sequences of LAMP primers and target induced-DNA  
187 strand displacement probes used in this study.

| Oligonucleotide | Sequence (5' – 3')          |
|-----------------|-----------------------------|
| F3              | CAAGAATTGACGGCATTGA         |
| B3              | ACCAATCCTGAAAATACTGC        |
| FIP (F1c-F2)    | CCATTTTATAACCAAATGCAGCACCAA |

| Oligonucleotide                    | Sequence (5' – 3')                              |
|------------------------------------|-------------------------------------------------|
|                                    | CCGAAGTTCATGATCCT                               |
| BIP (B1c-B2)                       | GATGTTGAGGGACTTTACTCACAAACA<br>CTGTTTGCAACAGTTG |
| DP-WB-CP (Capture probe)           | Biotin-TEG–<br>TTATAACCAAATGCAGCACCA CCAG       |
| DP-WB-RP (Reporter probe)          | Thiol Modifier C6 S-S–<br>GGTGCTGCATTTGGT TATAA |
| dT_BP-5Bio (Biotin blocking probe) | Biotin-TEG–TTTTTTTTTTT                          |
| dT_BP-5SS (Thiol blocking probe)   | Thiol Modifier C6 S-S–TTTTTTTTTTT               |

188

### 189 **LAMP reaction**

190 LAMP assay was performed in a total volume of 25 µl with *Bst* 2.0 WarmStart™ DNA  
191 Polymerase (New England Biolabs). The reagents, modified from [14], consisted of  
192 1× Isothermal buffer (20 mM Tris-HCl, 10 mM (NH<sub>4</sub>)<sub>2</sub>SO<sub>4</sub>, 50 mM KCl, 2 mM MgSO<sub>4</sub>,  
193 0.1% Tween 20, pH 8.8 at 25°C), 0.4 mM of each dNTPs (10 mM each, Invitrogen,  
194 USA), 0.8 M Betaine solution (5 M, Sigma, USA), 2 mM MgSO<sub>4</sub>, 1.6 µM of each  
195 internal primer (FIP/BIP), 0.4 µM of each external primer (F3/B3), 6.4 units of *Bst* 2.0  
196 DNA polymerase, 120 µM of hydroxy naphthol blue (HNB), metal (pM) indicator,  
197 Merck (Germany), and 4 µl DNA or approximately 20 ng of DNA. HNB is a  
198 visualizing indicator of magnesium ion reduction due to the magnesium  
199 pyrophosphate formation by LAMP [20]. The mixture was incubated at 65°C for 90  
200 min, followed by 80°C for 10 min. The concentrations of DNA (20–100 ng), *Bst* 2.0  
201 (1.6–8.0 U), and the reaction time (60–90 min) were varied depending upon  
202 experimental purposes as indicated.

203

### 204 **PCR reaction and gel electrophoresis**

205 *Wolbachia* detection was performed using primers wsp 81F and 691R for general  
206 *Wolbachia* detection (~600 bp); primers 183F and 691R for wAlbB detection (~500  
207 bp); and primers 328F and 691R for wAlbA detection (~380 bp), according to the  
208 method previously described [27]. The reactions were performed using final volumes  
209 of 25 µl, including 1.25 U *Taq* recombinant DNA polymerase (Invitrogen, USA), 1x  
210 PCR Buffer (- Mg), 3.75 mM MgCl<sub>2</sub>, 0.25 mM each dNTP (Invitrogen, USA), 0.5 µM  
211 each primer, and 1.0 µl template DNA. The amplifications were performed using a

212 thermal cycler (T100™ Thermo Cycler, Biorad, USA) with the following parameters:  
213 one step of 3 min at 94°C, 35 cycles of 45 s at 94°C, 30 sec at annealing temp (wsp  
214 58°C; Den 55°C, 16S 53°C), 45 sec at 72°C, and one step of 10 min at 72°C. All  
215 PCR products were detected by electrophoresis on a 2.0% (w/v) Agarose A gel  
216 (Biobasic, Canada)) containing 0.2 µg/ml Ethidium Bromide (Sigma, USA) in 1xTBE  
217 buffer (pH 8.0) at 100 V for 40 min and visualized under UV light. Five µl of the PCR  
218 and LAMP product was mixed with 2 µl of loading dye. Nucleic acid concentration  
219 was measured using NanoDrop™ One Microvolume UV-Vis Spectrophotometer  
220 (Thermo Fisher Scientific, USA)

221

### 222 **Functionalization of AuNPs conjugate with reporter probe**

223 Preparation of AuNPs–reporter probe (AuRP) conjugate was performed using the  
224 salt aging method [24]. Briefly, 10 µl of 100 µM reporter probe DNA and 30 µl of 100  
225 µM blocking probe sequences (PolyT<sub>10</sub>) thiolated DNA were activated by using 10  
226 mM Tris (2-carboxyethyl) phosphine (TCEP, Sigma-Aldric, USA) freshly prepared.  
227 Then, the thiol-activated DNA was added into 1 ml of 40 nm AuNPs solution (DCN  
228 Diagnostics, USA) and incubated overnight at room temperature. After incubation,  
229 the solution of 10 µl of 500 mM Tris-acetate pH 8.2 and 1 M NaCl 100 µl was added  
230 into the mixture and stored overnight before the next step. The excess probes were  
231 isolated by centrifugation at 14,000 rpm 30 min, followed by washing 3 times with 25  
232 mM Tris-acetate pH 7.4, resuspension with hybridization buffer, and then stored at  
233 4°C until use.

234

### 235 **Immobilizations capture probe on magnetic bead particle**

236 The immobilization of the biotinylated capture probe (CP) on the magnetic bead  
237 (MB), (Dynabeads T1, Thermo Fisher Scientific, USA) was performed according to  
238 the manufacturer's instruction. A 100 µl (10 µg/µl) of MB was washed 3 times with  
239 200 µl of 20 mM PBS pH 7.4, mixed with 4 µl of 100 µM capture probe, 12 µl of 100  
240 µM Biotin probe and 184 µl of 20 mM PBS pH 7.4, and then incubated for 40 min at  
241 room temperature. The MB-bound probe was washed 3 times with 20 mM PBS pH  
242 7.4, resuspended with 100 µl of 20 mM PBS pH 7.4, and then stored at 4°C until  
243 use. This conjugation was subsequently called magnetic bead conjugated capture  
244 probe DNA (MB-CP).



245

### 246 **DNA hybridization and DNA strand displacement reaction**

247 The prehybridization step of MB-CP and AuRP was prepared as follows: 2  $\mu$ l of MB-  
248 CP and 10  $\mu$ l of AuRP were added into 18  $\mu$ l of 20 mM PBS/0.1% SDS pH 7.4, and  
249 then incubated for 20 min at 45°C in a water bath. The prehybridized MB-CP and  
250 AuRP was then washed 3 times with 20 mM PBS pH 7.4 using magnet collection.  
251 The pellet was used for a DNA strand displacement experiment. For DNA strand  
252 displacement, 30  $\mu$ l of target DNA was added to resuspend the pellet and then  
253 incubate at 60°C for 30 min. A magnet was used to separate the target DNA bound  
254 to MB-CP from the unbound (displaced). AuNP-RP and 5 ml of the supernatant was  
255 used for signal detection.

256

### 257 **Electrochemical detection of AuRP from DNA strand displacement reaction**

258 Displaced AuRP was detected by using electrochemical measurement by the  
259 differential pulse anodic stripping voltammetry (DPASV) technique on PalmSens 4  
260 computer-controlled potentiostat with PStTrace version 5.7 software (PalmSens, The  
261 Netherlands). Two electrode systems screened printed carbon electrodes or SPCE  
262 (Quesence, Thailand) — which consisted of two carbon tracks as working electrode,  
263 reference electrode, and counter electrode in DPASV — were used. 5  $\mu$ l of the  
264 desired sample was loaded onto a working electrode surface, followed by 50  $\mu$ l of 1  
265 M hydrobromic acid (HBr)/0.1M bromine solution ( $\text{Br}_2$ ). For the pre-treatment step,  
266 the condition for deposition potential was -0.75 V and the deposition time was 100  
267 sec. The step potential was set at 0.005 V, with the interval time set at 0.1 sec. The  
268 modulation amplitude was 0.1 V and the modulation time 0.05 sec.

269

### 270 **Detection of nucleic acid derived from wAlbB**

271 The products of the wAlbB LAMP reaction and PCR of *wsp* genes, wAlbA *wsp* gene,  
272 and wAlbB *wsp* gene were applied to the biosensor detection. In addition, the  
273 macerated mosquito samples from the laboratory colony and field collection were  
274 used in this study. The concentration of the DNA was determined by measuring the  
275 absorbance at 260 nm, using the NanoDrop™ One Microvolume UV-Vis  
276 Spectrophotometer (USA) in the DNA strand displacement platform, followed by  
277 differential pulse anodic stripping voltammetry (DPASV) detection.

278

## 279 **Results**

### 280 **LAMP primer and probe design**

281 The *wsp* genes of *Wolbachia* trans-infected Thai *Ae. aegypti* were sequenced. This  
282 sequence was compared to 17 *wsp* genes of *Wolbachia* wAlbB in mosquitoes from  
283 the NCBI database. The consensus region around 230 bp was submitted to  
284 PrimerExplorer software. The recommended LAMP primer sets were compared to  
285 686 sequences of *wsp* genes from 66 *Wolbachia* strains [27-29] and all *wsp* genes of  
286 *Ae. aegypti* and *Ae. albopictus* in the database. The set of sequences that could bind  
287 to all wAlbB sequences and were different from most other strains were selected  
288 (Table 1).

289  
290 By comparing the *wsp* gene sequences and considering that LAMP may amplify  
291 even with few primer bindings, it was seen that our primers could have non-specific  
292 bindings to some *Wolbachia* strains in mosquitoes, including wPip in *Ae. aegypti*  
293 (MK860184-5), *Ae. albopictus* (MF805773, MF805775) and *Cx. pipiens*  
294 *quinquefasciatus* (AF301012); wAnsA in *Anopheles* sp. (MH605284); *Wolbachia*  
295 strains in some *Cx. quinquefasciatus* (KJ140125), *Cx. tritaeniorhynchus* (KY457713),  
296 *Cx. pipiens* (KJ500030); wFus in *Cx. fuscocephala* (AF317481); wMad in *Aedeomyia*  
297 *madagascariensis* (MK033272); wKes in *Armigeres kesseli* (AF317489); *Wolbachia* in  
298 some *Ar. subalbatus* (KY457714, KY457720) and *Ar. obturbans* (KJ140130,  
299 KJ140132), and wPseu in *Ae. pseudalbopictus* (AF317487). The nonspecific  
300 bindings of the wAlbB specific LAMP primers in the previous study [14] were  
301 broader, as they could bind more *Wolbachia* strains in mosquitoes, including wDec in  
302 *Cx. decens* (MK033274); wUra2 in *Uranotaenia* sp. (MK033278); wUnif in *Mansonia*  
303 *uniformis* (AF317493); some *Wolbachia* in *Ma. uniformis* (MH777433, KY523674);  
304 wNoto in *Ae. notoscriptus* (KT962260); wFlu in *Ochlerotatus fluviatilis* (KF898395);  
305 wInd in *Ma. Indiana* (AF317492); wSit in *Cx. sitiens* (AF317491); wPerp in *Ae.*  
306 *perplexus* (AF317486); wGel in *Cx. gelidus* (AF317482); and wCra in *Coquillettidia*  
307 *crassipes* (AF317478) but they could not bind with wAnsA in *Anopheles* sp.  
308 (MH605284).

309  
310 Since the previous work [14] used oligonucleotide strand displacement (OSD)  
311 probes and quencher technology for LAMP detection, the assay reported only the  
312 probe priming region. The 'WSP-OSD' probe in the previous work [14] could detect

313 wPip (MK860184-5, MF805775), *Wolbachia* strains in some *Culex* spp. (AF301012,  
314 KJ140125, KY457719, AF317487); *Armigeres* spp. (KY457714, KY457720,  
315 KJ140132, KJ140130, AF317489), and *Aedeomyia madagascariensis* (MK033272),  
316 whereas the 'wAlbB vs wPip OSD probe' [14] or 'WSP.BLP loop' reported in another  
317 study [16] would bind only wAlbB, *Wolbachia* strains in some *Armigeres* spp.  
318 (KY457720, KJ140132, KJ140130, AF317489); and wPseu in *Aedes*  
319 *pseudalbopictus* (AF317487). If the LAMP assays were conducted with non-specific  
320 detecting methods like HNB dye, Sybr green I, or Cresol Red, our LAMP primer set  
321 would be more specific to wAlbB detection.

322

323 In addition, the new primers B3, FIP, and BIP in our study had higher GC rate (40-  
324 42%), closer to the recommended range for good binding primers of 50-60% [30]  
325 than those reported previously (35-40%). Our LAMP primers had a melting  
326 temperature in the range of 55.2–61.3°C, where the delta G values of 3' and 5' ends  
327 were -6.24 to -4.07 kcal/mol and -5.69 to -4.02 kcal/mol, respectively, and the dimer  
328 (minimum) delta G was -2.16 kcal/mol. For the capture probe design, we selected  
329 the consensus region overlapping with the F1c binding area, so as to increase the  
330 attachment of the probe to the structures of complex LAMP products (Figure 1).

331

### 332 **LAMP assay**

333 The developed LAMP primer set was used to examine the presence of *Wolbachia* in  
334 mosquito samples, i.e., *Ae. albopictus* naturally superinfected with wAlbA and wAlbB,  
335 *Cx. quinquefasciatus* naturally infected with wPip [29], wild-type *Ae. aegypti*  
336 mosquitoes which do not harbor *Wolbachia* [31], and wAlbB trans-infected Thai *Ae.*  
337 *aegypti* (Figure 2). The LAMP assay clearly showed positive *Wolbachia* detection for  
338 the *Wolbachia* trans-infected Thai *Ae. aegypti*, *Ae. albopictus*, and *Cx.*  
339 *quinquefasciatus*, as indicated by the blue color of HNB in the reactions due to the  
340 loss of Mg<sup>2+</sup> ions to the magnesium pyrophosphate precipitation and the presence of  
341 a ladder-like band pattern upon gel electrophoresis, while wild-type *Ae. aegypti* and  
342 the control reaction (no-template control (NTC)), which were negative, gave a purple  
343 color without ladder-like bands that was observed upon gel electrophoresis. These  
344 results were in agreement with the gold standard PCR method, suggesting the  
345 potential of these newly designed LAMP primers to detect *Wolbachia* infection in  
346 mosquitoes. It is noteworthy that, as predicted from *in silico* analysis, all primers

347 except for B3 could bind to the wsp sequence of the laboratory *Cx. quinquefasciatus*  
348 (MZ325223). The previous LAMP-OSD assay also detected wPip in *Cx.*  
349 *quinquefasciatus* in their study. To verify the efficiency on differentiating wAlbB  
350 strains, we repeated the test with 45 *Ae. albopictus*, 20 wAlbB trans-infected Thai *Ae.*  
351 *aegypti*, and 20 wild-type *Ae. aegypti*. All tests gave the expected results correctly. It  
352 is noteworthy that LAMP could amplify the DNA binding target even though not all  
353 primers bound to the region, as shown in the case of *Cx. quinquefasciatus*.

354

355 To optimize LAMP detection, the concentration of the DNA template was examined.  
356 *Ae. albopictus* and wAlbB trans-infected Thai *Ae. aegypti* were used as positive  
357 controls. Wild type *Ae. aegypti* and NTC were used as negative controls. The  
358 amounts of DNA template varied between 20 and 100 ng (supplementary Figure S1).  
359 The ladder-like bands were observed for *Ae. albopictus* and wAlbB trans-infected  
360 Thai *Ae. aegypti* samples for all template amounts, which were in contrast to the  
361 results of wild-type *Ae. aegypti* and NTC. Wild-type *Ae. aegypti* showed a darker  
362 blue-purple color closer to the positive control at a higher amount of DNA. However,  
363 at the DNA amount of 100 ng, the color from the wild-type *Ae. aegypti* reaction could  
364 not be differentiated from that of the positive reaction. Therefore, the amount of DNA  
365 should be controlled in the range of 20–80 ng, with the most recommended DNA  
366 amount being 20 ng.

367

368 The LAMP assay was tested with different *Bst* polymerase concentrations from 1.6–  
369 8.0 Units (Supplementary Table S1). The color development between the positive  
370 and negative control could be more distinguished at higher concentrations of *Bst*  
371 (3.2–8.0 Units). At 1.6 Units *Bst*, a false negative result was obtained for the  
372 *Wolbachia* trans-infected Thai *Ae. aegypti*. Hence, *Bst* at concentrations of 3.2–6.4  
373 Units were recommended for cost saving and visual observation. However, in the  
374 present study, we used 6.4 Units of *Bst*, as was done in many previous studies [12,  
375 14, 32].

376

377 We also tried to develop the LAMP reaction at 60 and 90 min for 20 and 40 ng  
378 template DNA (Figure S2). The HNB and gel results were positive for *Ae. albopictus*  
379 (P) and negative for NTC at both 60 and 90 min for 20–40 ng DNA. However, the  
380 blue lavender color in the 60-min reaction of *Ae. albopictus* at 40 ng was ambiguous

381 for visual observation. Therefore, 90 min was recommended. This is consistent with  
382 previous studies which also suggested 90 min for LAMP amplification [12, 14].  
383 Besides, the concentration of HNB used in this study was only 0.12 mM, which is 10-  
384 time less than that reported in the previous work [12]. However, the range of HNB  
385 dye concentration could be varied without affecting the LAMP reaction.

386

387 The LAMP reaction was performed with diluted DNA from the *Ae. albopictus* sample  
388 (156.6 ng/ $\mu$ l) in a total reaction volume of 25  $\mu$ l with 4  $\mu$ l DNA template. A 10-fold  
389 dilution of the DNA sample was prepared (Figure 3). Both LAMP and PCR could  
390 amplify the positive samples up to  $10^{-4}$  dilution, which was equivalent to 62.6 pg  
391 DNA in 25  $\mu$ l, or a DNA concentration of 3.8 nM. However, both LAMP and PCR  
392 techniques failed to detect DNA at a concentration below 0.38 nM. At a DNA  
393 concentration 3.8 nM, PCR yielded a very faint band, whereas color visualization and  
394 ladder-bands of LAMP reaction could be distinguishable from the negative control  
395 reaction. Therefore, LAMP had better sensitivity than PCR. We concluded that the  
396 limit of detection (LOD) of LAMP in this study was 3.8 nM.

397

### 398 **DNA sensors assay**

399 Biosensor was applied to increase the sensitivity of LAMP detection and to reduce  
400 ambiguity in LAMP visualization. Figure 4 shows the sensitivity of the strand  
401 displacement method with a synthetic wAlbB linear target using electrochemical  
402 detection. The results showed the LOD of 2.16 fM for the target DNA (5  
403 Signal/Noise). The linear range was 1 fM to 1  $\mu$ M ( $R^2 = 0.93$ ). The electrochemical  
404 with the target strand displacement platform has a much higher sensitivity than the  
405 LAMP and PCR techniques in a magnitude of  $10^6$ . Therefore, the sensitivity of  
406 *Wolbachia* DNA detection could be enhanced dramatically by using the  
407 electrochemical DNA sensors technology.

408

409 Initially, we wanted to use biosensor in combination with LAMP amplification so as to  
410 reduce ambiguity in LAMP visual judgement and increase speed of the detection.  
411 We had applied this technology to the LAMP amplified samples (Figure 5-L). The  
412 results obtained from electrochemical detection clearly showed a good discrimination  
413 between wAlbB-infected mosquitoes (L.Alb and L.AegB) and non-infected  
414 mosquitoes (L.AegW). For the positive target, PCR products of *Wolbachia* detection

415 with general wsp primers of the mosquitoes containing wAlbB (P.wsp Alb, P.wsp  
416 AegB, P.wAlbB Alb, and P.wAlbB AegB) were detected. The detection signal for  
417 negative samples from the mosquitoes without wAlbB (P.wsp AegW) were lower  
418 than the threshold value at 30 nA, as shown in Figure 5. In addition, electrochemical  
419 detection with the wAlbB targeting capture probe did not respond to the PCR product  
420 of wAlbA (P.wAlbA Alb); though the mosquito DNA templates contained wAlbB. This  
421 test could effectively separate the detection of wAlbA and wAlbB.

422

423 As we discovered high sensitivity of *Wolbachia* detection with the electrochemical  
424 DNA sensors, we applied it to test the presence of the wAlbB region directly in the  
425 macerated mosquito samples without any *in vitro* amplification. Figure 6  
426 demonstrates positive detection for wAlbB trans-infected Thai *Ae. aegypti*  
427 (ML.AegB1-2), *Ae. albopictus* (ML.Alb1 and MF.Alb1-2), and *Cx. vishnui*  
428 (MF.Cx.vis1-3), as well as the negative detection for wild-type *Ae. aegypti*  
429 (ML.AegW1-2 and MF.AegW1-2) and *Cx. gelidus* (MF.Cx.gel1-2) from both  
430 laboratory colonies and field samples. As mentioned earlier, most of the studies  
431 reported no *Wolbachia* infection in wild-type *Ae. aegypti* and superinfection by wAlbA  
432 and wAlbB in *Ae. Albopictus*. We obtained the expected results here. Moreover,  
433 previous studies reported the infection of wCon belong to the Supergroup B for the  
434 *Cx. vishnui* [31, 33-35], and the infection of *Cx. gelidus* belong to Supergroup A [33-  
435 35]. Our biosensor platform only detected the signal in *Cx. vishnui* in Supergroup B.  
436 Though the detection was not specific to only wAlbB, a combination of the  
437 conventional morphological taxonomy and the molecular detection of mosquito  
438 species biomarkers [14, 16] could simply differentiate the mosquitoes in *Aedes* and  
439 *Culex* groups.

440

## 441 **Discussion**

442 This study developed a LAMP combined with the electrochemical detection of AuRP  
443 from a DNA strand displacement platform for detection of the wAlbB strain of  
444 *Wolbachia* bacteria. The methods, i.e., LAMP, LAMP plus BIOSENSOR, and  
445 BIOSENSOR alone, could be applied as surveillance and monitoring tools for the  
446 *Wolbachia* trans-infected *Ae. aegypti* release programs. Since most studies thus far  
447 reported an absence of *Wolbachia* in the wild-type *Ae. aegypti* [11, 31, 33, 35-37], it

448 can be assumed that the *Wolbachia* in *Ae. aegypti* detected in the field surveillance  
449 and monitoring study is likely to be from the release programs.

450

451 Although, there were few previous studies reporting the detection of natural infection  
452 of *Wolbachia* in *Ae. aegypti* [38-45], the *Wolbachia* detection methods in these  
453 studies employed only molecular approaches, which are prone to contamination and  
454 may be subjected to horizontal gene transfer from the adjacent larvae or parasitic  
455 nematodes. Only two studies reported the successful establishment of laboratory  
456 colonies of *Wolbachia*-infected *Ae. aegypti* and demonstrated the inherited vertical  
457 transmission of *Wolbachia* to F2 [13] and F4 [38] generations. In another  
458 independent study [11], however, the cytoplasmic incompatibility and molecular  
459 detection on the putatively *Wolbachia*-infected *Ae. aegypti* Las Cruces colony (New  
460 Mexico) of the previous work [13] were examined, but *Wolbachia* in this colony could  
461 not be found. Therefore, the authors concluded that the evidence of *Wolbachia* in  
462 *Ae. aegypti* was not compelling [11]. Regarding the intangible evidence of *Wolbachia*  
463 infection in natural *Ae. aegypti*, comprehensive monitoring of the infection status of  
464 *Wolbachia* should be continued, especially prior to the release of *Wolbachia* trans-  
465 infected mosquitoes. Our detection schemes using LAMP, BIOSENSOR, or a  
466 combination could serve this purpose well, as these methods are much more  
467 sensitive than the conventional PCR method and can reduce the need for laboratory  
468 equipment and molecular biology specialists.

469

470 Regarding the cost analysis, excluding DNA extraction, LAMP reagents would cost  
471 around \$1.5–\$3.0/reaction [14, 16]. PCR costs around \$0.7. The qPCR cost around  
472 \$1.0 . If the qPCR included triple replicates and standard curve preparation, the cost  
473 could be increased to \$3-5 per sample [16]. For BIOSENSOR, the approximate cost  
474 would be \$2.0. The crude DNA extraction used in this study costed less than \$0.5  
475 per sample; although the DNA extraction kit might cost up to \$10 per sample. In  
476 addition, LAMP required only a single temperature controlled heat block with UV  
477 cabinet or clean space, at an investment cost around \$1,200. PCR will cost at least  
478 \$5,500 with a simple gel visualizing instrument, while qPCR will be at least \$40,000.  
479 Although the electrochemical detection of BIOSENSOR costs around \$1,300 in the  
480 start-up experiment, the method is cost-effective in the long term. Needless to say,  
481 both LAMP and BIOSENSOR, including the combination, would greatly increase the

482 speed of *Wolbachia* detection. Therefore, these methods are very suitable for  
483 application in the field, where assessment of expensive molecular laboratory  
484 instruments is limited.

485

486 We tested the stability of reagent mixture (- template) storing in the freezer (-20°C)  
487 to minimize errors caused by pipetting. Upon adding the DNA template, the LAMP  
488 reagent stored up to 20 days could amplify the wAlbB trans-infected Thai *Ae.*  
489 *aegypti*, as indicated by the ladder-like band in agarose gel; although, the faint blue  
490 color could be observed when the reagent was stored up to 30 days (Figure S3). It is  
491 noteworthy that a number of recent works, and also commercial products, support  
492 the possibility of preparing the LAMP reagent in freeze-dried form. Other studies  
493 showed that the lyophilized LAMP reagents remained stable for 24 months when  
494 stored at 4°C, 28 days at 25°C, 20 days at room temperature, and 2 days at 37°C  
495 [39, 40]. In addition, it is also possible to prepare the strand displacement biosensor  
496 reagent in the lyophilized prehybridization mixture. A previous study demonstrated  
497 that the prehybridization mixture stored at 4°C is stable up to 3 months without  
498 significant decrease in the current signal [24]. However, a decrease of 18% and 30%  
499 in the current signal was found in the mixture stored at 25°C and an outdoor ambient  
500 temperature (24–34°C) for 50 days, respectively. Further study is needed to apply  
501 the lyophilization technique to the *Wolbachia* detecting reagent so as to facilitate the  
502 studies which have limited resource settings.

503

504 The storage period of the dead mosquito body was also an important concern for a  
505 field survey. The results showed that the LAMP reaction could amplify 2 among 3  
506 mosquito samples kept in a freezer (-20°C, without ethanol) up to 10 days (Figure  
507 S4). Storage of mosquito samples at 4°C, 27°C, and 37°C for 10 days did not  
508 produce the ladder-like bands. However, the LAMP color development results of 2–3  
509 samples of 10-day samples stored at 4°C, 27°C, and 37°C gave blue color. The  
510 results from other days were false positive as compared to the negative control (wild-  
511 type *Ae. aegypti*). This is consistent with the previous work, which reported that 6  
512 among 10 mosquito samples kept at -20°C for 7 days gave a positive color as  
513 compared to the color of the no-template-control [14]. For the samples kept at 14  
514 days and 21 days, 5 and 1 mosquito samples, respectively, among the 10 total  
515 samples each were positive. A LAMP positive signal of 2 mosquito samples among



516 10 samples, which had been stored at 4°C, could be observed up to 2 weeks, while  
517 the signal at 37°C could not be observed from 1-week samples [14]. Since the  
518 negative (no-*Wolbachia* mosquito control) was not prepared, the results reported  
519 might be overestimated. We also observed clear distinguishable colors between no  
520 template controls and mosquito samples up to 30 days from samples stored at 37°C.  
521 Interestingly, PCR gave positive results for the dead mosquitoes kept at -20°C for at  
522 least 30 days and 4°C for 20 days (Figure S5), although the LAMP could not detect  
523 any signal. This might be due to degradation of DNA. With respect to mosquito  
524 storage conditions, detection of *Wolbachia* from dead mosquitoes stored in a dry  
525 condition up to 30 days at 26°C and 10 days at 37°C has been reported [16]. The  
526 use of the Genie1 III machine with real-time fluorescence detection was found to  
527 increase the sensitivity and reliability of typical LAMP detections with gel  
528 electrophoresis and color development [16]. The speed of detection could be  
529 increased to 6–12 mins using 6 LAMP primers (including 2 loops) [16].

530

531 The LAMP primers and electrochemical biosensing method with strand displacement  
532 platform were successfully employed to detect the mosquito samples containing the  
533 wAlbB strain of *Wolbachia* bacteria. The tests provided high sensitivity and specificity  
534 suitable for field surveys of mosquito distribution in *Wolbachia*-based projects using  
535 wAlbB trans-infected *Ae. aegypti* and the monitoring of natural *Wolbachia* infections  
536 in the wild-type *Ae. aegypti*. This knowledge will have tremendous impact, enhance  
537 the field of biological control of mosquito vectors, and reduce the problems of  
538 arboviral transmission causing millions of deaths in world populations annually.

539

#### 540 **Acknowledgements**

541 The authors would like to acknowledge Dr. Lee Su Yin from AIMST University; Dr.  
542 Surang Chankhamhaengdecha, Mr. Thanawat Sridapan, Miss Nuanla-ong  
543 Kaeothaisong from Mahidol University for their technical assistance; and Mr. David  
544 Blyler for English editing. The authors declared that there is no conflict of interest.

545

#### 546 **References**

- 547 1. World Health Organization (WHO). Guidelines on the quality, safety and efficacy  
548 of dengue tetravalent vaccines (live, attenuated). 2013 8 October 2013. Report  
549 No.: 979.

- 550 2. McGraw EA, O'Neill SL. Beyond insecticides: new thinking on an ancient  
551 problem. *Nature Reviews Microbiology*. 2013;11(3):181-93. doi:  
552 10.1038/nrmicro2968.
- 553 3. Zug R, Hammerstein P. Still a host of hosts for *Wolbachia*: Analysis of recent  
554 data suggests that 40% of terrestrial arthropod species are infected. *PLoS ONE*.  
555 2012;7(6):e38544. doi: 10.1371/journal.pone.0038544.
- 556 4. Sinkins SP. *Wolbachia* and cytoplasmic incompatibility in mosquitoes. *Insect*  
557 *Biochemistry and Molecular Biology*. 2004;34(7):723-9. doi:  
558 <https://doi.org/10.1016/j.ibmb.2004.03.025>.
- 559 5. Ruang-Areerate T, Kittayapong P. *Wolbachia* transinfection in *Aedes aegypti*: A  
560 potential gene driver of dengue vectors. *Proceedings of the National Academy of*  
561 *Sciences, USA*. 2006;103(33):12534-9. Epub 2006/08/08. doi:  
562 10.1073/pnas.0508879103. PubMed PMID: 16895998.
- 563 6. Hoffmann AA, Montgomery BL, Popovici J, Iturbe-Ormaetxe I, Johnson PH,  
564 Muzzi F, et al. Successful establishment of *Wolbachia* in *Aedes* populations to  
565 suppress dengue transmission. *Nature*. 2011;476(7361):454-7. doi:  
566 10.1038/nature10356.
- 567 7. McMeniman CJ, Lane RV, Cass BN, Fong AWC, Sidhu M, Wang Y-F, et al.  
568 Stable introduction of a life-shortening *Wolbachia* infection into the mosquito  
569 *Aedes aegypti*. *Science*. 2009;323(5910):141-4. doi: 10.1126/science.1165326.
- 570 8. Flores HA, O'Neill SL. Controlling vector-borne diseases by releasing modified  
571 mosquitoes. *Nature Reviews Microbiology*. 2018;16(8):508-18. doi:  
572 10.1038/s41579-018-0025-0.
- 573 9. World mosquito program. How our method compares 2021 [cited 2021 12 April  
574 2021]. Available from: [https://www.worldmosquitoprogram.org/en/learn/how-our-](https://www.worldmosquitoprogram.org/en/learn/how-our-method-compares)  
575 [method-compares](https://www.worldmosquitoprogram.org/en/learn/how-our-method-compares).
- 576 10. Ricci I, Cancrini G, Gabrielli S, D'amelio S, Favia G. Searching for *Wolbachia*  
577 (*Rickettsiales: Rickettsiaceae*) in mosquitoes (*Diptera: Culicidae*): Large  
578 polymerase chain reaction survey and new identifications. *Journal of Medical*  
579 *Entomology*. 2002;39(4):562-7. doi: 10.1603/0022-2585-39.4.562.
- 580 11. Ross PA, Callahan AG, Yang Q, Jasper M, Arif MAK, Afizah AN, et al. An  
581 elusive endosymbiont: Does *Wolbachia* occur naturally in *Aedes aegypti*?  
582 *Ecology and Evolution*. 2020;10(3):1581-91. doi: 10.1002/ece3.6012.

- 583 12. Gonçalves DdS, Cassimiro APA, de Oliveira CD, Rodrigues NB, Moreira LA.  
584 *Wolbachia* detection in insects through LAMP: Loop mediated isothermal  
585 amplification. *Parasites and Vectors*. 2014;7(1):228. doi: 10.1186/1756-3305-7-  
586 228.
- 587 13. Kulkarni A, Yu W, Jiang J, Sanchez C, Karna AK, Martinez KJL, et al. *Wolbachia*  
588 *pipientis* occurs in *Aedes aegypti* populations in New Mexico and Florida, USA.  
589 *Ecology and Evolution*. 2019;9(10):6148-56. doi: 10.1002/ece3.5198.
- 590 14. Bhadra S, Riedel TE, Saldaña MA, Hegde S, Pederson N, Hughes GL, et al.  
591 Direct nucleic acid analysis of mosquitoes for high fidelity species identification  
592 and detection of *Wolbachia* using a cellphone. *PLoS Neglected Tropical*  
593 *Diseases*. 2018;12(8):e0006671. doi: 10.1371/journal.pntd.0006671.
- 594 15. Gonçalves DdS, Hooker DJ, Dong Y, Baran N, Kyrylos P, Iturbe-Ormaetxe I, et  
595 al. Detecting wMel *Wolbachia* in field-collected *Aedes aegypti* mosquitoes using  
596 loop-mediated isothermal amplification (LAMP). *Parasites and Vectors*.  
597 2019;12(1):404. doi: 10.1186/s13071-019-3666-6.
- 598 16. Jasper ME, Yang Q, Ross PA, Endersby-Harshman N, Bell N, Hoffmann AA. A  
599 LAMP assay for the rapid and robust assessment of *Wolbachia* infection in  
600 *Aedes aegypti* under field and laboratory conditions. *PLoS ONE*.  
601 2019;14(11):e0225321. doi: 10.1371/journal.pone.0225321.
- 602 17. Pagendam DE, Trewin BJ, Snoad N, Ritchie SA, Hoffmann AA, Staunton KM, et  
603 al. Modelling the *Wolbachia* incompatible insect technique: Strategies for  
604 effective mosquito population elimination. *BMC Biology*. 2020;18(1):161. doi:  
605 10.1186/s12915-020-00887-0.
- 606 18. Ross PA, Ritchie SA, Axford JK, Hoffmann AA. Loss of cytoplasmic  
607 incompatibility in *Wolbachia*-infected *Aedes aegypti* under field conditions. *PLoS*  
608 *Neglected Tropical Diseases*. 2019;13(4):e0007357. doi:  
609 10.1371/journal.pntd.0007357.
- 610 19. Zhang X, Lowe SB, Gooding JJ. Brief review of monitoring methods for loop-  
611 mediated isothermal amplification (LAMP). *Biosensors and Bioelectronics*.  
612 2014;61:491-9. doi: <https://doi.org/10.1016/j.bios.2014.05.039>.
- 613 20. Kuan GC, Sheng LP, Rijiravanich P, Marimuthu K, Ravichandran M, Yin LS, et  
614 al. Gold-nanoparticle based electrochemical DNA sensor for the detection of fish  
615 pathogen *Aphanomyces invadans*. 2013;117:312-7.

- 616 21. Liew PS, Lertanantawong B, Lee SY, Manickam R, Lee YH, Surareungchai  
617 WJT. Electrochemical genosensor assay using lyophilized gold  
618 nanoparticles/latex microsphere label for detection of *Vibrio cholerae*.  
619 2015;139:167-73.
- 620 22. Cajigas S, Alzate D, Orozco J. Gold nanoparticle/DNA-based nanobioconjugate  
621 for electrochemical detection of Zika virus. *Microchimica Acta*. 2020;187(11):594.  
622 doi: 10.1007/s00604-020-04568-1.
- 623 23. Ngamdee T, Yin LS, Vongpunsawad S, Poovorawan Y, Surareungchai W,  
624 Lertanantawong B. Target Induced-DNA strand displacement reaction using gold  
625 nanoparticle labeling for hepatitis E virus detection. *Analytica Chimica Acta*.  
626 2020;1134:10-7. doi: <https://doi.org/10.1016/j.aca.2020.08.018>.
- 627 24. Kittayapong P, Ninphanomchai S, Limohpasmanee W, Chansang C, Chansang  
628 U, Mongkalangoon P. Combined sterile insect technique and incompatible insect  
629 technique: The first proof-of-concept to suppress *Aedes aegypti* vector  
630 populations in semi-rural settings in Thailand. *PLoS Neglected Tropical*  
631 *Diseases*. 2019;13(10):e0007771-e. doi: 10.1371/journal.pntd.0007771. PubMed  
632 PMID: 31658265.
- 633 25. Ahantarig A, Trinachartvanit W, Kittayapong P. Relative *Wolbachia* density of  
634 field-collected *Aedes albopictus* mosquitoes in Thailand. *Journal of Vector*  
635 *Ecology*. 2008;33(1):173-7.
- 636 26. Kumar S, Stecher G, Tamura K. MEGA7: Molecular Evolutionary Genetics  
637 Analysis version 7.0 for bigger datasets. *Molecular Biology and Evolution*.  
638 2016;33:1870-4.
- 639 27. Zhou W, Rousset F, O'Neil S. Phylogeny and PCR-based classification of  
640 *Wolbachia* strains using *wsp* gene sequences. *Proceedings Biological sciences*.  
641 1998;265(1395):509-15. doi: 10.1098/rspb.1998.0324. PubMed PMID: 9569669.
- 642 28. Silva LMld, Dezordi FZ, Paiva MHS, Wallau GL. Systematic review of *Wolbachia*  
643 symbiont detection in mosquitoes: An entangled topic about methodological  
644 power and true symbiosis. *Pathogens*. 2021;10(1):39. PubMed PMID:  
645 doi:10.3390/pathogens10010039.
- 646 29. Ruang-Areerate T, Kittayapong P, Baimai V, O'Neill SL. Molecular phylogeny of  
647 *Wolbachia* endosymbionts in Southeast Asian Mosquitoes (*Diptera: Culicidae*)  
648 based on *wsp* gene sequences. *Journal of Medical Entomology*. 2003;40(1):1-5.

- 649 30. Eiken Chemical Co. Ltd. A Guide to LAMP primer designing (PrimerExplorer V5)  
650 2019. Available from: [https://primerexplorer.jp/e/v5\\_manual/index.html](https://primerexplorer.jp/e/v5_manual/index.html).
- 651 31. Kittayapong P, Baisley KJ, Baimai V, O'Neill SL. Distribution and diversity of  
652 *Wolbachia* infections in Southeast Asian mosquitoes (*Diptera: Culicidae*).  
653 Journal of Medical Entomology. 2000;37(3):340-5. doi:  
654 10.1093/jmedent/37.3.340.
- 655 32. Zhou D, Guo J, Xu L, Gao S, Lin Q, Wu Q, et al. Establishment and application  
656 of a loop-mediated isothermal amplification (LAMP) system for detection of  
657 *cry1Ac* transgenic sugarcane. Scientific Reports. 2014;4(1):4912. doi:  
658 10.1038/srep04912.
- 659 33. Mohanty I, Rath A, Swain SP, Pradhan N, Hazra RK. *Wolbachia* population in  
660 vectors and non-vectors: A sustainable approach towards dengue control.  
661 Current Microbiology. 2019;76(2):133-43. doi: 10.1007/s00284-018-1596-8.
- 662 34. Ravikumar H, Ramachandraswamy N, Puttaraju HP. Molecular strain typing of  
663 *Wolbachia* infection from Indian mosquitoes using *wsp* gene. Asian Pacific  
664 Journal of Tropical Disease. 2011;1(2):106-9. doi: [https://doi.org/10.1016/S2222-](https://doi.org/10.1016/S2222-1808(11)60046-7)  
665 1808(11)60046-7.
- 666 35. Nugapola NWNP, De Silva WAPP, Karunaratne SHPP. Distribution and  
667 phylogeny of *Wolbachia* strains in wild mosquito populations in Sri Lanka.  
668 Parasites and Vectors. 2017;10(1):230. doi: 10.1186/s13071-017-2174-9.
- 669 36. Soni M, Bhattacharya C, Sharma J, Khan SA, Dutta P. Molecular typing and  
670 phylogeny of *Wolbachia*: A study from Assam, North-Eastern part of India. Acta  
671 Tropica. 2017;176:421-6. doi: <https://doi.org/10.1016/j.actatropica.2017.09.005>.
- 672 37. Gloria-Soria A, Chiodo TG, Powell JR. Lack of Evidence for Natural *Wolbachia*  
673 Infections in *Aedes aegypti* (*Diptera: Culicidae*). Journal of Medical Entomology.  
674 2018;55(5):1354-6. doi: 10.1093/jme/tjy084.
- 675 38. Balaji S, Jayachandran S, Prabakaran SR. Evidence for the natural occurrence  
676 of *Wolbachia* in *Aedes aegypti* mosquitoes. FEMS Microbiology Letters.  
677 2019;366(6). doi: 10.1093/femsle/fnz055.
- 678 39. Chen H-W, Ching W-M. Evaluation of the stability of lyophilized loop-mediated  
679 isothermal amplification reagents for the detection of *Coxiella burnetii*. Heliyon.  
680 2017;3(10):e00415. doi: <https://doi.org/10.1016/j.heliyon.2017.e00415>.
- 681 40. Carter C, Akrami K, Hall D, Smith D, Aronoff-Spencer E. Lyophilized visually  
682 readable loop-mediated isothermal reverse transcriptase nucleic acid

683 amplification test for detection Ebola Zaire RNA. Journal of Virological Methods.  
684 2017;244:32-8. doi: <https://doi.org/10.1016/j.jviromet.2017.02.013>.

685

## 686 **Figure captions**

687 **Figure 1.** Schematic diagram demonstrates the LAMP primers and probe binding  
688 locations on the target sequences of the wAlbB *wsp* gene. Grey boxes indicate the  
689 primer sequences. Grey letters are the complementary sequence of the wAlbB  
690 sequence in the 5'-3' direction. Blue and red fonts indicate the capture and reporter  
691 probes, respectively.

692

693 **Figure 2.** Detection of *Wolbachia* wAlbB gene in different mosquito species using  
694 LAMP assay with HNB indicator (A) and ethidium bromide stained gel (B): (1) no  
695 template control, (2) wild-type *Aedes aegypti*, (3) *Wolbachia* trans-infected Thai  
696 *Aedes aegypti*, (4) *Aedes albopictus*, and (5) *Culex quinquefasciatus*. M is 1 kb plus  
697 DNA Ladder from Invitrogen™. The condition for LAMP reaction was 6.4 units of *Bst*  
698 2.0 DNA polymerase, 65°C for 60 min and 80°C for 10 min.

699

700 **Figure 3.** Detection of *Wolbachia* wAlbB gene using LAMP assay with HNB indicator  
701 (A) and ethidium bromide stained gel (B) of a 10-fold dilution of an individual *Aedes*  
702 *albopictus* sample (156.6 ng/μl, 260/280 = 1.8, 260/230 = 0.89) including 10<sup>1</sup> – 10<sup>-10</sup>  
703 times. Polymerase chain reaction with *wsp* primers (691R and 183F) of the same  
704 dilution (C). (6.4 units of *Bst* 2.0 DNA polymerase, 65°C for 60 min and 80°C for 10  
705 min) (O) is non-diluted original sample, (N) is No template control, (M upper) is  
706 Invitrogen™ 1 kb plus DNA Ladder, and (M lower) is Invitrogen™ 100 bp DNA  
707 Ladder.

708

709 **Figure 4.** Calibration curve of synthetic wAlbB linear target strand displacement  
710 platform using electrochemical detection.

711

712 **Figure 5.** Electrochemical detection of wAlbB LAMP products (L) and PCR products  
713 (P). PCR reactions were performed for the general *wsp* gene (81F/691R), *wAlbA*  
714 gene (328F/691R), and *wAlbB* gene (183F/691R). Different mosquito species were  
715 included as follows: wild-type *Ae. aegypti* (AegW), wAlbB trans-infected Thai *Ae.*

716 *aegypti* (AegB), and *Ae. albopictus* (Alb). Samples giving peak currents above 30 nA  
717 were considered positive.

718

719 **Figure 6.** Electrochemical detection of macerated mosquitoes of laboratory colonies  
720 (ML) and field samples (MF). Different mosquito species were included as follows:  
721 wild-type *Ae. aegypti* (AegW), wAlbB trans-infected Thai *Ae. aegypti* (AegB), *Ae.*  
722 *albopictus* (Alb), *Cx. gelidus* (*Cx.gel*) and *Cx. vishnui* (*Cx.vis*). Samples giving peak  
723 currents above 30 nA were considered positive.

724

### 725 **Supporting information captions**

726 **Figure S1.** Detection of *Wolbachia* wAlbB gene using LAMP assays with Ethidium  
727 bromide stained gel (A) and Hydroxy Naphthol Blue indicator (B) under different DNA  
728 template mass of the different mosquito species including *Aedes albopictus* (1),  
729 *Aedes aegypti* (2), and *Wolbachia* transinfected Thai *Aedes aegypti* (3). (N) is no-  
730 template control and (M) is Invitrogen™ 1 Kb Plus DNA Ladder. The sizes of DNA  
731 (bp) were indicated. LAMP reaction was performed using 3.2 units of *Bst* 2.0 DNA  
732 polymerase at 65°C for 90 min.

733

734 **Table S1.** Detection of *Wolbachia* wAlbB gene using LAMP assays with Hydroxy  
735 Naphthol Blue indicator (B) under different *Bst* 2.0 Polymerase concentrations of the  
736 different mosquito species. N is no-template control. LAMP reaction was performed  
737 at 65°C for 90 min.

738

739 **Figure S2.** Detection of *Wolbachia* wAlbB gene using LAMP assays with Ethidium  
740 bromide stained gel (A) and Hydroxy Naphthol Blue indicator (B) under different  
741 incubation times for 60 and 90 min with a DNA template of 20 and 40 ng. P is *Aedes*  
742 *albopictus* and N is no-template control. M is Invitrogen™ 1 Kb Plus DNA Ladder.  
743 The sizes of DNA (bp) were indicated. LAMP reaction was performed using 3.2 units  
744 of *Bst* 2.0 DNA polymerase at 65°C for 90 min.

745

746 **Figure S3.** Detection of *Wolbachia* wAlbB gene using LAMP assays with Ethidium  
747 bromide stained gel (A) and Hydroxy Naphthol Blue indicator (B) with varying LAMP  
748 reagent (included *Bst* polymerase) at -20°C freezer under different incubation times  
749 for 60 and 90 min with a DNA template of 20 and 40 ng. P is *Aedes albopictus* and N

750 is wild-type *Ae. aegypti*, and NT is no-template control (NTC). M is Invitrogen™ 1 Kb  
751 Plus DNA Ladder. The sizes of DNA (bp) were indicated. LAMP reaction was  
752 performed using 6.4 units of Bst 2.0 DNA polymerase at 65°C for 60 min and 80°C  
753 for 10 min.

754

755 **Figure S4.** Detection of the *Wolbachia* wAlbB gene using LAMP assays with  
756 Ethidium bromide stained gel (upper) and Hydroxy Naphthol Blue indicator (lower),  
757 with the dead mosquitoes stored at different temperatures including -20°C (A), 4°C  
758 (B), 27°C (C), and 37°C (D). 1–3 are wAlbB infected *Ae. aegypti* mosquitoes. P is  
759 *Aedes albopictus*. N is wild-type *Ae. aegypti*, and NT is no-template control (NTC). M  
760 is Invitrogen™ 100 bp or 1kb plus DNA Ladder. The sizes of DNA (bp) were  
761 indicated. LAMP reaction was performed using 6.4 units of *Bst* 2.0 DNA polymerase,  
762 65°C for 60 min and 80°C for 10 min.

763

764 **Figure S5.** Detection of *Wolbachia* wAlbB gene using PCR with Ethidium bromide  
765 stained agarose gel, with the dead mosquitoes stored at different temperatures  
766 including -20°C, 4°C, 27°C, and 37°C. 1–3 are wAlbB infected *Ae. aegypti*  
767 mosquitoes. P is *Aedes albopictus*. N is wild-type *Ae. aegypti*, and NT is no-template  
768 control (NTC). “-” is no loading well. M is Invitrogen™ 100 bp DNA Ladder. The sizes  
769 of DNA (bp) were indicated.



Figure 1

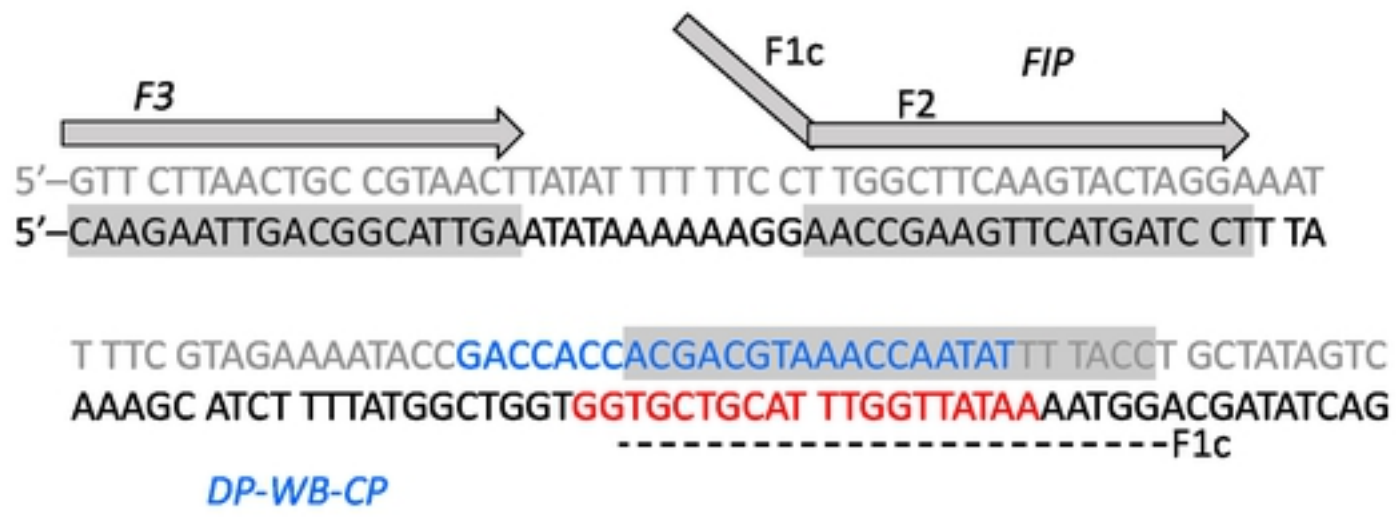

bioRxiv preprint doi: <https://doi.org/10.1101/2021.06.30.450550>; this version posted June 30, 2021. The copyright holder for this preprint (which was not certified by peer review) is the author/funder, who has granted bioRxiv a license to display the preprint in perpetuity. It is made available under aCC-BY 4.0 International license.

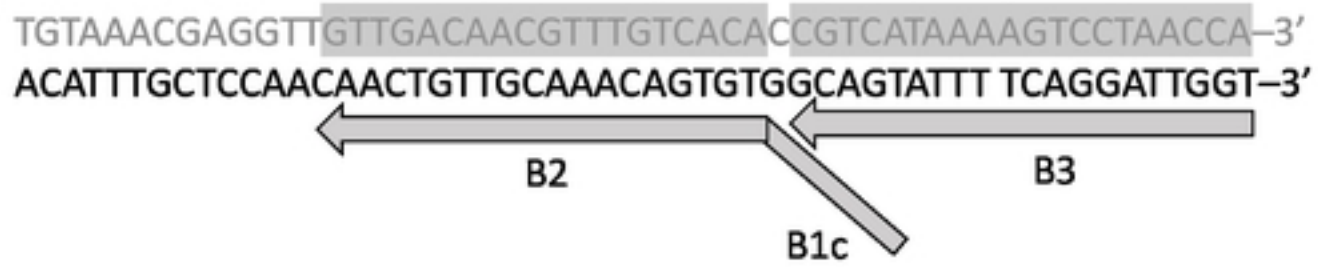

Figure 2

A

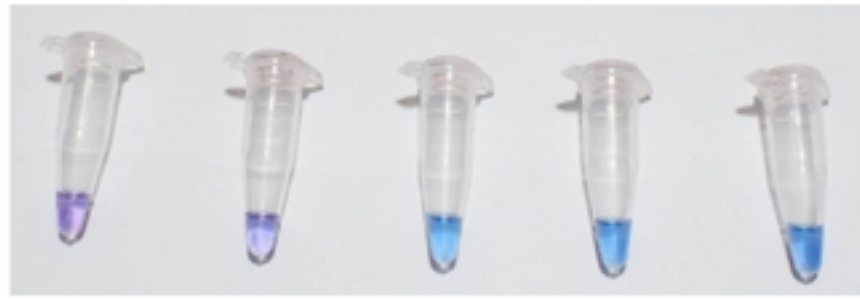

M 1 2 3 4 5

B

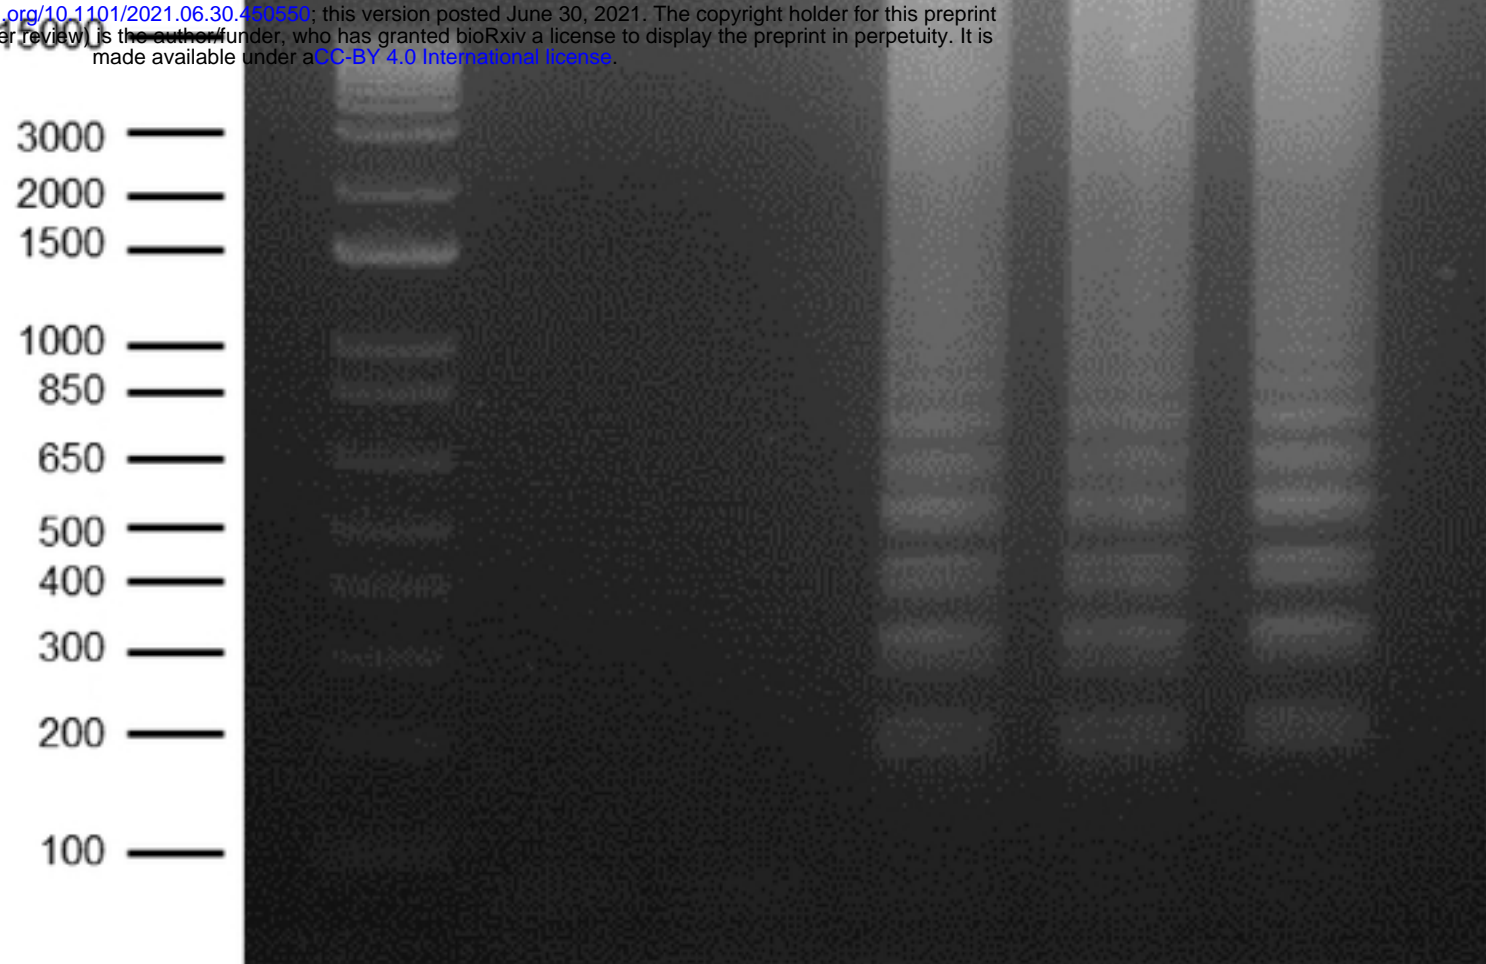

Figure 3

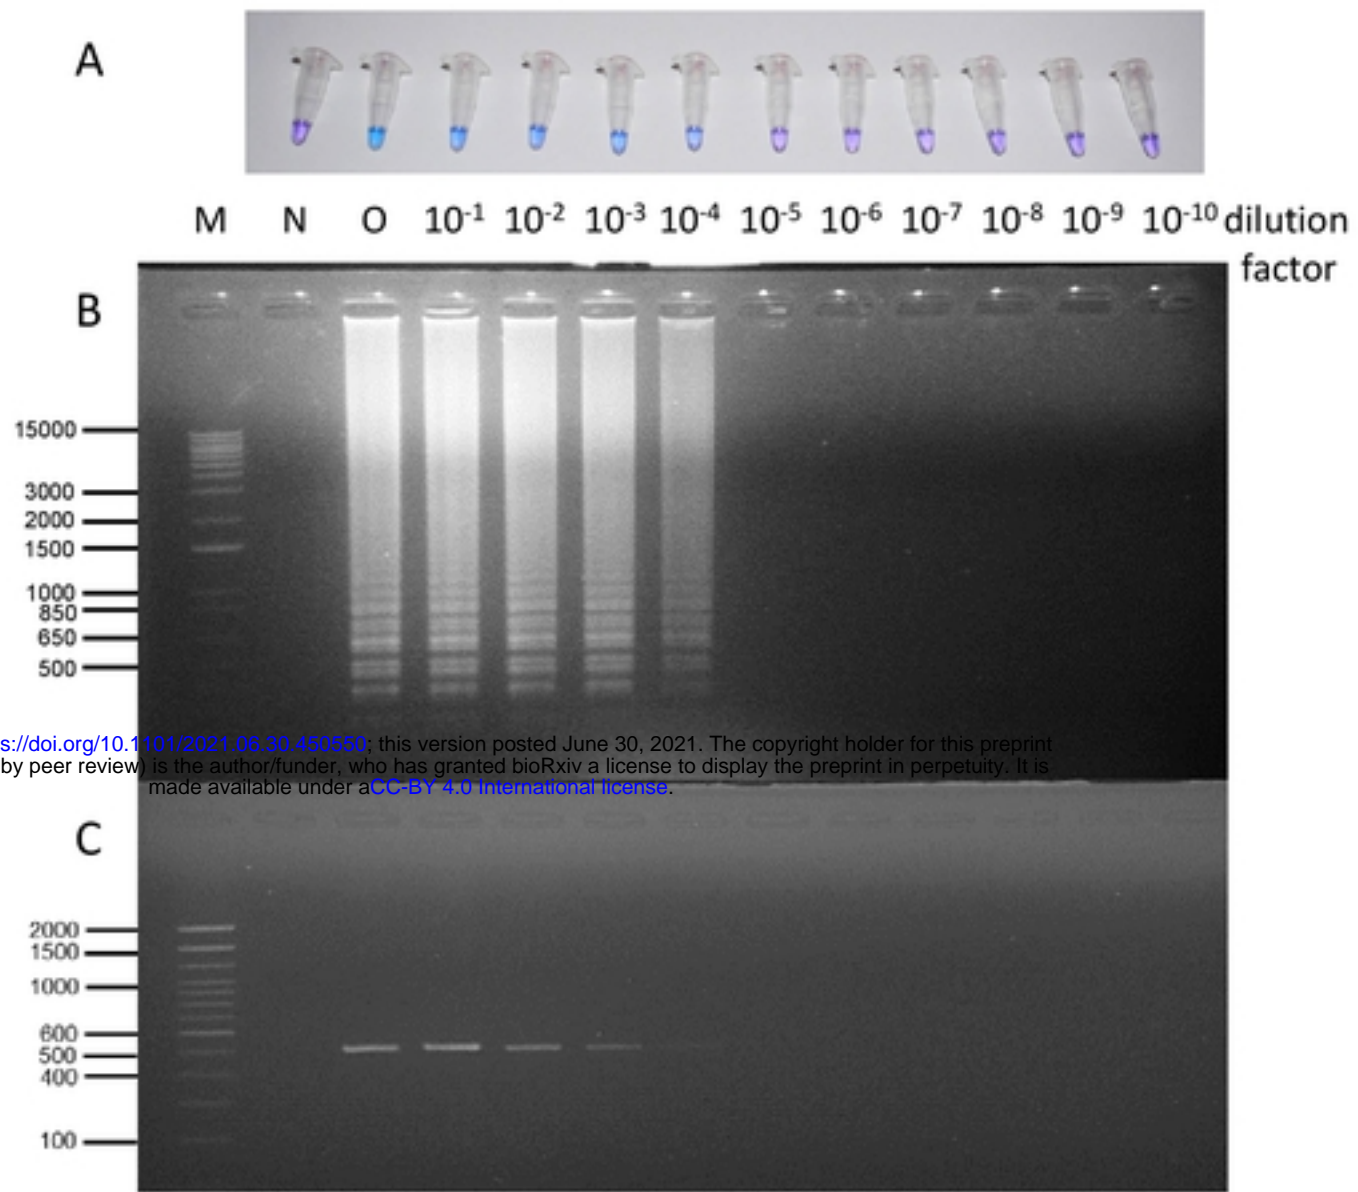

bioRxiv preprint doi: <https://doi.org/10.1101/2021.06.30.450550>; this version posted June 30, 2021. The copyright holder for this preprint (which was not certified by peer review) is the author/funder, who has granted bioRxiv a license to display the preprint in perpetuity. It is made available under a [CC-BY 4.0 International license](https://creativecommons.org/licenses/by/4.0/).

Figure 4

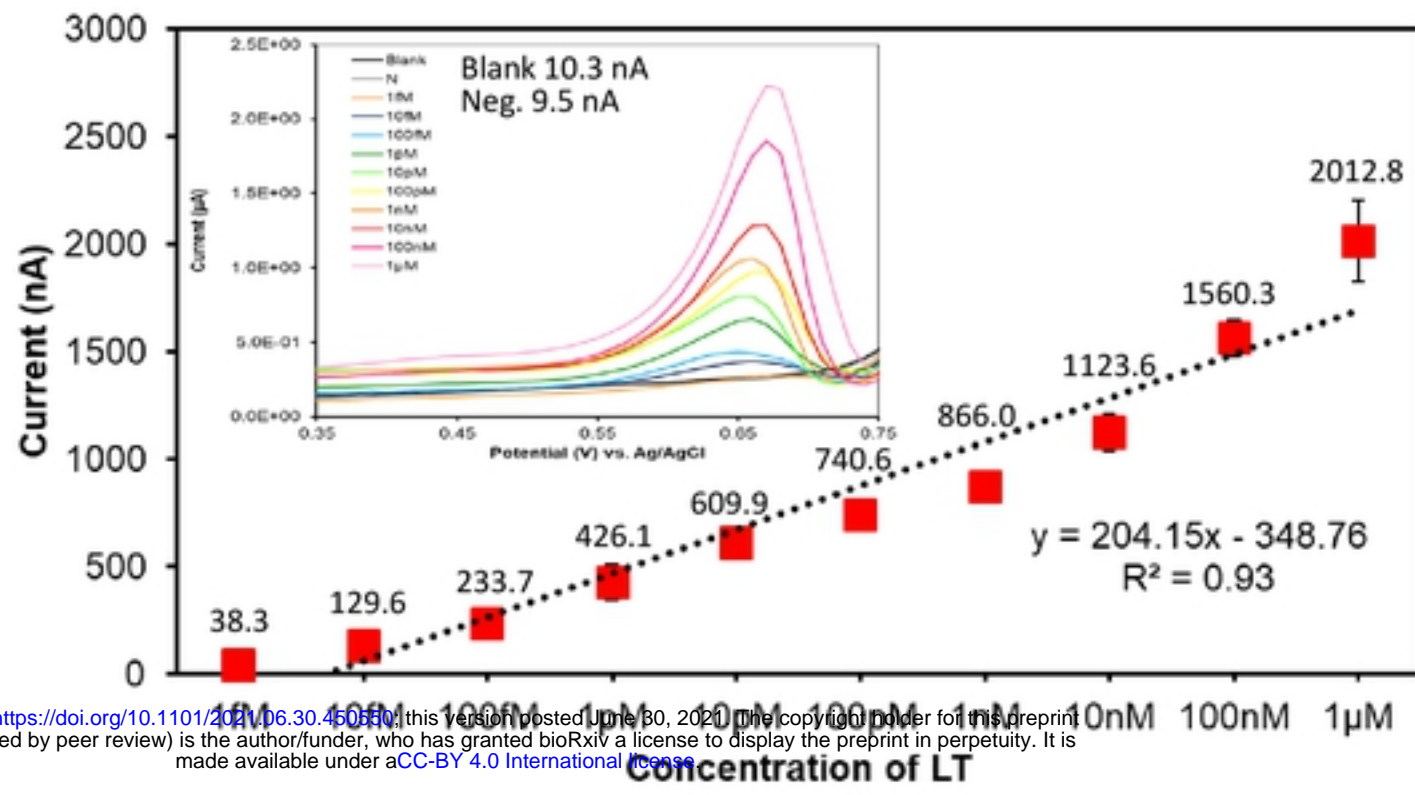

bioRxiv preprint doi: <https://doi.org/10.1101/2021.06.30.450550>; this version posted June 30, 2021. The copyright holder for this preprint (which was not certified by peer review) is the author/funder, who has granted bioRxiv a license to display the preprint in perpetuity. It is made available under aCC-BY 4.0 International license.

## Figure 5

bioRxiv preprint doi: <https://doi.org/10.1101/2021.06.30.450550>; this version posted June 30, 2021. The copyright holder for this preprint (which was not certified by peer review) is the author/funder, who has granted bioRxiv a license to display the preprint in perpetuity. It is made available under a [CC-BY 4.0 International license](#).

## Figure 6

bioRxiv preprint doi: <https://doi.org/10.1101/2021.06.30.450550>; this version posted June 30, 2021. The copyright holder for this preprint (which was not certified by peer review) is the author/funder, who has granted bioRxiv a license to display the preprint in perpetuity. It is made available under a [CC-BY 4.0 International license](#).
